# Supplementary material
Source: PubMed Central journal article supplement (PMC4907111)
Supplement: JB.00159-16_zjb999094099so1.pdf [file JB.00159-16_zjb999094099so1.pdf]

| Lab code | sequence                                                              | Use                           |
|----------|-----------------------------------------------------------------------|-------------------------------|
| Ebm846   | CCGCTCGAGTTTTTCGCCCGATTACCTTAC                                        | rpIU promoter XhoI FW         |
| Ebm847   | CGGAATTCTACCACCACTTTGGAAAACCG                                         | rpIU promoter EcoRI RV        |
| Ebm861   | TTCGGATCTACCACCACTTTGGAAAACCG                                         | rpIU promoter BamHI RV        |
| Ebm860   | CCGCTCGAGTCTTCGTGTATTGACTGTAGCAC                                      | Δbox XhoI FW                  |
| Ebm1005  | CCGCTCGAGATAAACGTTACCGTACAAGTTG                                       | Δbox2 XhoI                    |
| Ebm886   | GGGTGATTGTACTGAACCGGTGGCACAGATAAACGTTAC                               | Box* FW                       |
| Ebm887   | GTAACGTTTATCTGTGCCACCGGTTCACTACAATCACCC                               | Box* RV                       |
| Ebm555   | CCGCTCGAGATGTACGCGTTTTCCAAAG                                          | UPrpmA XhoI FW & RT-PCR a 5'  |
| Ebm556   | CGGGATCCAACCTACGTTAGCGCCAGC                                           | UPrpmA BamHI RV               |
| Ebm848   | CCGCTCGAGATGGCACATAAAAAGGCTGGC                                        | UPyhbE XhoI FW & RT-PCR b 5'  |
| Ebm849   | GGAATTCGGATCCAGCGCCAAAAGAATGCCAATG                                    | UPyhbEnew BamHI RV            |
| Ebm557   | CCGCTCGAGATTGCGCTTTCCTCTGG                                            | UPobgE XhoI FW & RT-PCR c 5'  |
| Ebm558   | CGGGATCCTTTATTCTCCGTAATCATTCCGC                                       | UPobgE BamHI RV               |
| Ebm917   | CCGCTCGAGACATGACGAAAGGACTACACCG                                       | csgD promoter XhoI FW         |
| Ebm918   | GGAATTCGGATCCAGTACTGACAGATGTTGCACTGC                                  | csgD promoter BamHI RV        |
| Ebm852   | ACCGAATTCATGTACGCGTTTTCCAAAGTG                                        | <i>rpIU</i> CDS EcoRI         |
| Ebm968   | TTGCTCGAGAAGCAGCTCCAGCCTACACG                                         | P2RV XhoI                     |
| Ebm770   | ACCGAATTCATGGCGTTTTACAAATTGGTG                                        | <i>mlrA</i> CDS EcoRI         |
| Ebm771   | TTGCTCGAGTTAAATGCCGAGTGGGAAAATATC                                     | <i>mlrA</i> CDS XhoI          |
| Ebm688   | TCGGAATATACTTTTCGCGGCG                                                | RT-PCR a,b 3'                 |
| Ebm640   | ACGCTCGAGTTAAGCCAGCAGCATCAGCTCC                                       | RT-PCR c 3'                   |
| Ebm892   | ATAAGTTTTTCGCGTCCCAGTACGTTGCGGGGCTTTTACATTC                           | Δ terminator                  |
| Ebm893   | GAATGTAAAAGCCCCGCAACGTACCGGGACGCGAAAACTTAT                            | Δ terminator                  |
| Ebm913   | GTTAAAGGCCCGAAAAACCGTAAATTTATCAGCATCGAAGCTGAAATTCCTCAACTACTGCTAGC     | rpmA-3Flag FW                 |
| Ebm914   | GCAACGTGTTGCGGGGCTTTTCATCCGTTACCGGGACGCGAAAAACCATATGAATATCCTCCTTAG    | rpmA-3Flag RV                 |
| Ebm559   | TTACGTAAGCATACAACGGTGGTATCGCAACCCCGCGCAGGCGAATCCATGGA<br>AAAGAGAAG    | yhbE-SPA FW                   |
| Ebm560   | CAGAATCGATGCTTCATCAACAACTTCATTTTATTCTCCGTAAACATATGAAT<br>ATCCTCCTTAG  | yhbE-SPA RV                   |
| Ebm596   | TGGGACGAAGACGACGAAGAAGCGGTTGAGTTCATTTACAAGCGTATTCCAAC<br>TACTGCTAGC   | obgE-3Flag FW                 |
| Ebm562   | GATAAGCGTAGCGCATCAGGCTGATTTGGCGTTTATCATCAGTGACATATGAAT<br>ATCCTCCTTAG | obgE-3Flag RV                 |
| RLG6565  | TACGGTGAATCTTGTACTGAAAAAATGGCACAGATAAACGTTACCG                        | EcoRI <i>PrpIU</i> (-112) FW  |
| RLG6566  | TTCGCAAAGCTTCGCACACCTTTTCAATGATTCAGAGTGC                              | HindIII <i>PrpIU</i> (+48) RV |

**Table S1 : Oligonucleotides**
